# Supplementary material
Source: PubMed Central journal article supplement (PMC7253013)
Supplement: jciinsight-5-135826-s038.pdf [file jciinsight-5-135826-s038.pdf]

## **Supplemental information**

### **CIC is a Critical Regulator of Neuronal Differentiation**

Inah Hwang, Heng Pan, Jun Yao, Olivier Elemento, Hongwu Zheng and Jihye Paik

A

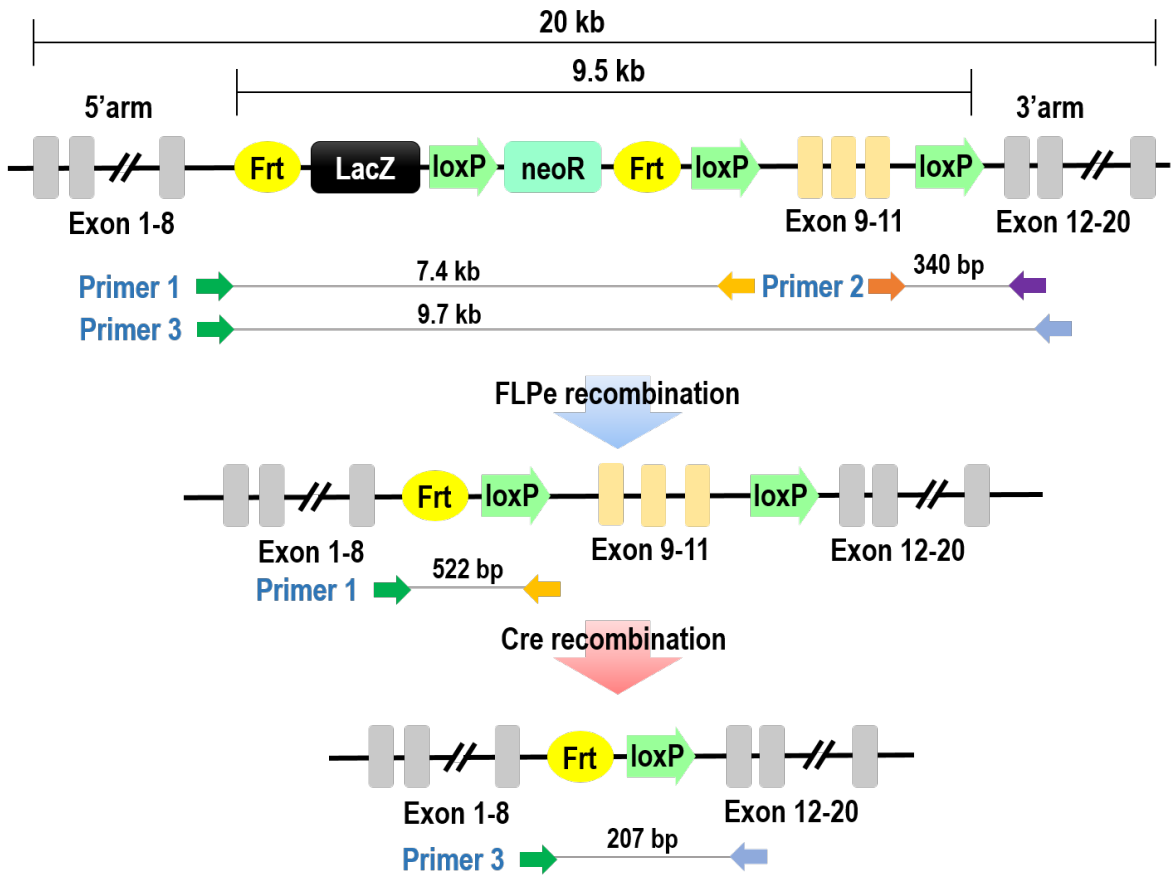

B

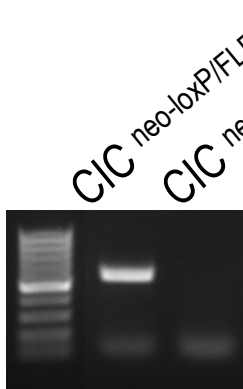

Primer 1

C

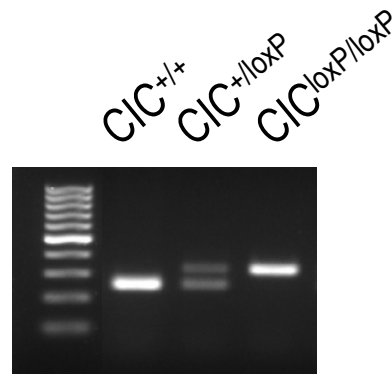

Primer 2

D

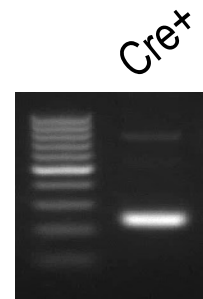

Primer 3

**Supplemental figure 1. Generation of *Cic<sup>KO</sup>* mouse.** A. Diagram for *Cic<sup>L/L</sup>*. FRT site flanked neomycin resistance cassette was removed by crossing to transgenic animals expressing hACTB:FLPe in the germ line. The LoxP site was removed by crossing to *Nes cre* transgenic mouse. B. PCR result with primer set 1 after removing FRT site. C. PCR result with primer set 2. D. PCR result of *Cic<sup>KO</sup>* brain with primer set 3.

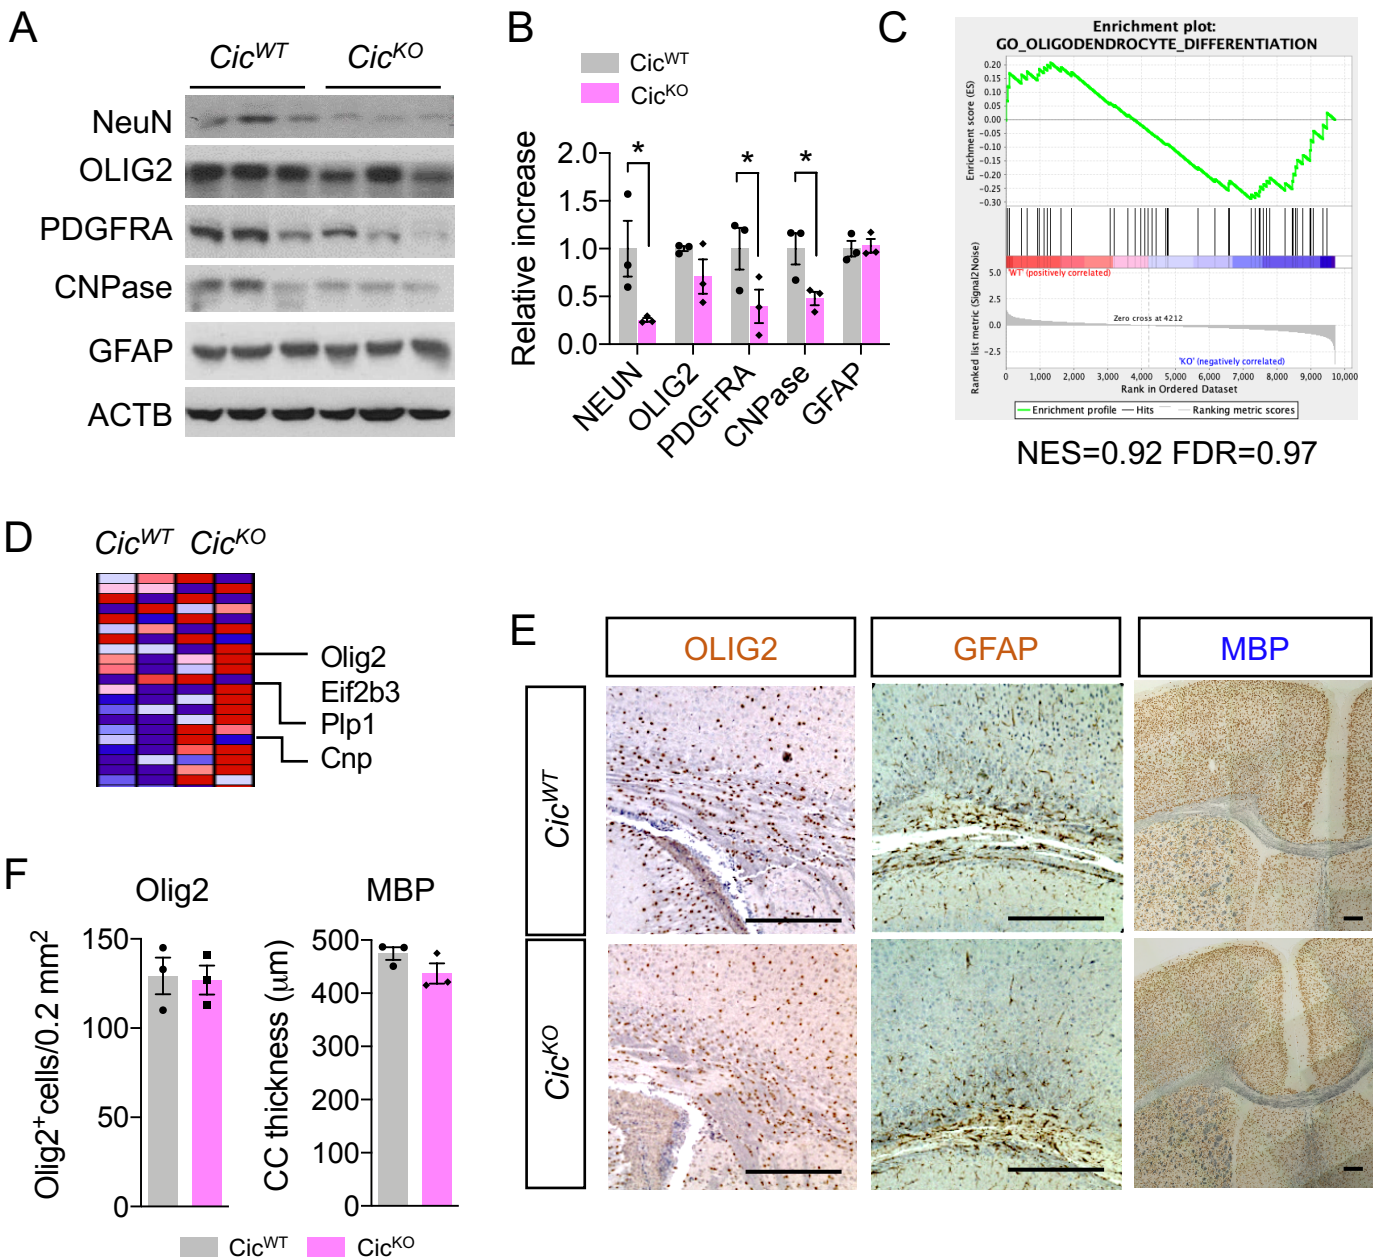

**Supplemental figure 2. Gliogenesis was not altered in *Cic<sup>KO</sup>* brains.** A. WB analysis of P0.5 *Cic<sup>WT</sup>* and *Cic<sup>KO</sup>* brains. Samples were run on 4 gels and the most representative ACTB blot is shown. B. Analyze for multiple WB in (A) are plotted. Mean  $\pm$  s.e.m. of 3 experimental animals. C. GSEA for oligodendrocyte differentiation. D. Heatmap for RNA-seq of P0.5 *Cic<sup>WT</sup>* and *Cic<sup>KO</sup>* brains. E. IHC for OLIG2 (brown), GFAP (brown), and MBP (blue) in P14 *Cic<sup>WT</sup>* and *Cic<sup>KO</sup>* brains. Scale bar=400  $\mu$ m. F. Quantifications for (E) images are plotted. Mean  $\pm$  s.e.m. of 3 images from independent animals. Statistical significance was determined by unpaired t-test for B and F. \*\*\* $p < 0.001$ . CC: Corpus callosum.

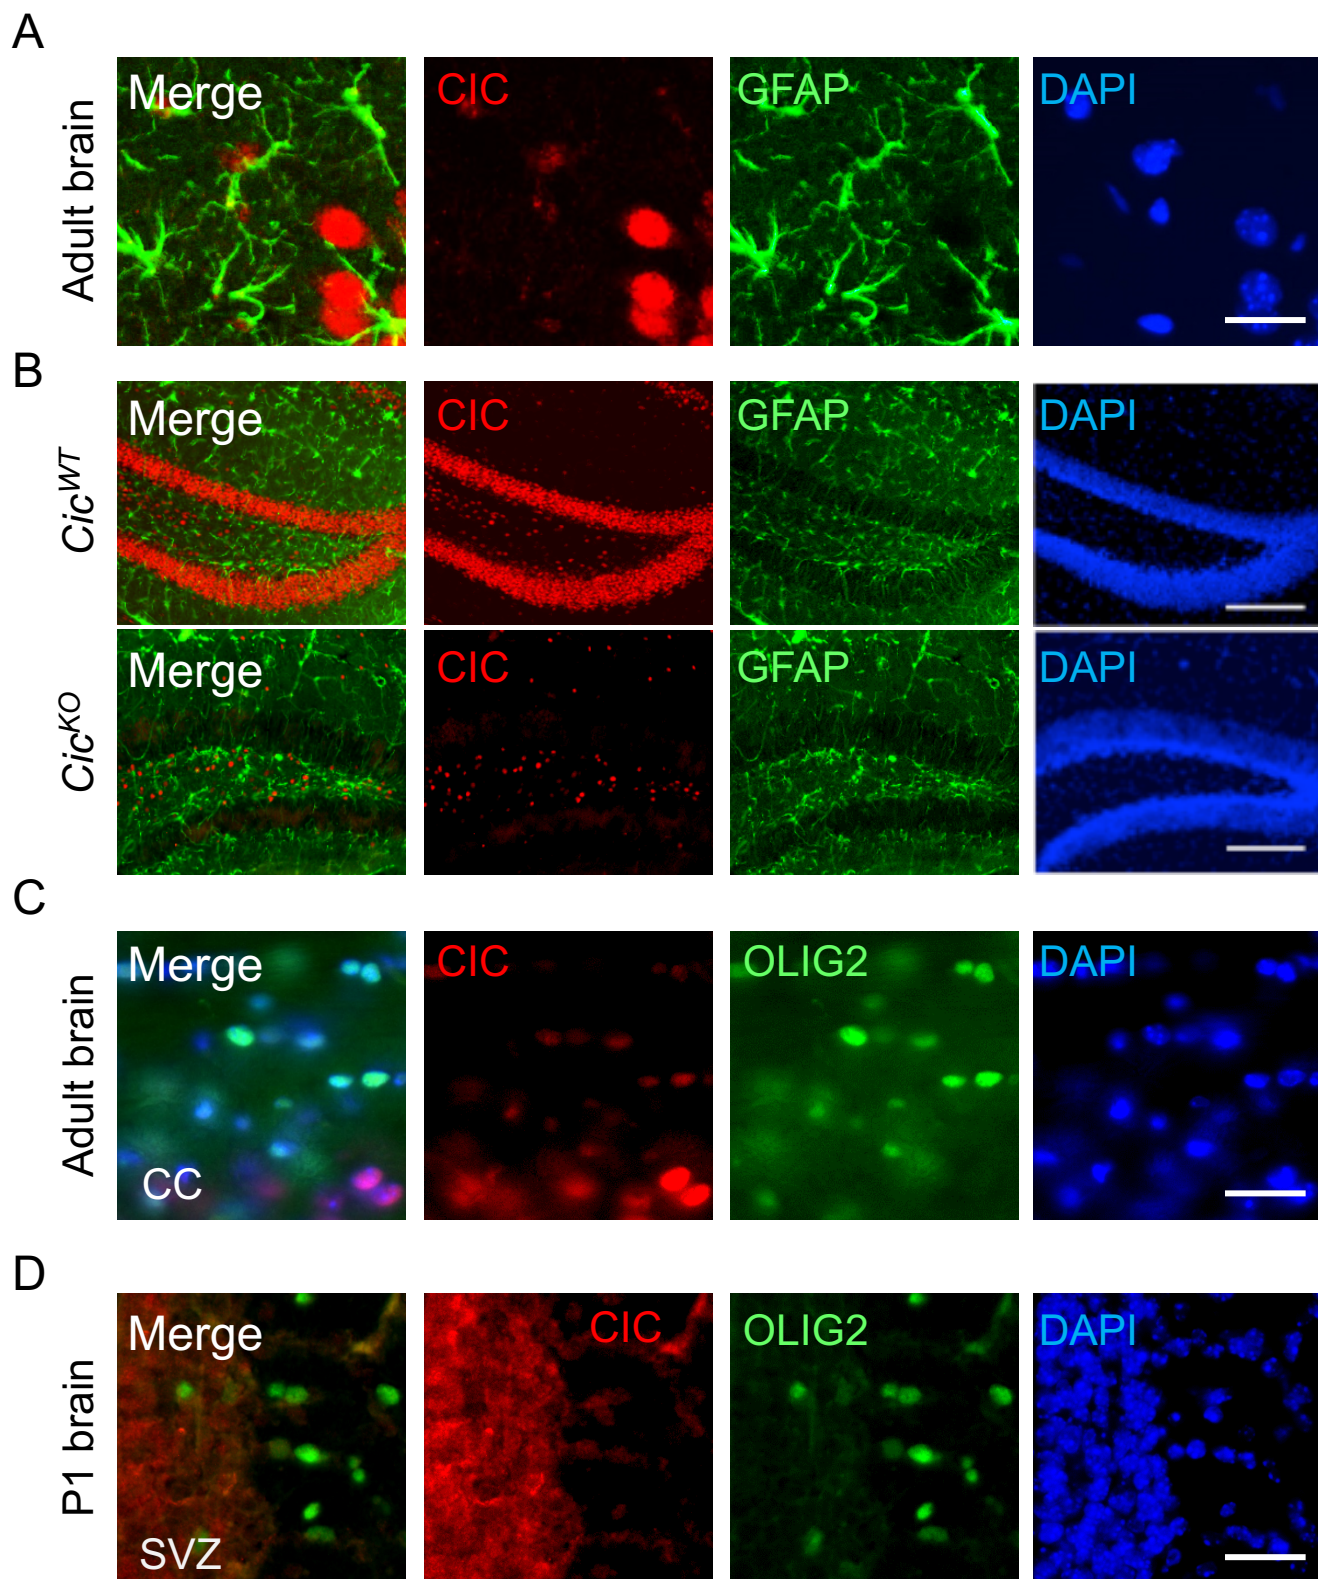

**Supplemental figure 3. The expression of CIC in oligodendrocytes and astrocytes.** A and B. Co-IF for GFAP and CIC in P14 brains. Scale bar=25  $\mu$ m (A) and 200  $\mu$ m (B). C and D. Co-IF for OLIG2 and CIC in P14 (C) and P0.5 (D) postnatal brain (D). CC: Corpus callosum, SVZ: Subventricular zone, Scale bar=25  $\mu$ m. 3 experiments were conducted and the most representative experiment is shown for A-D.

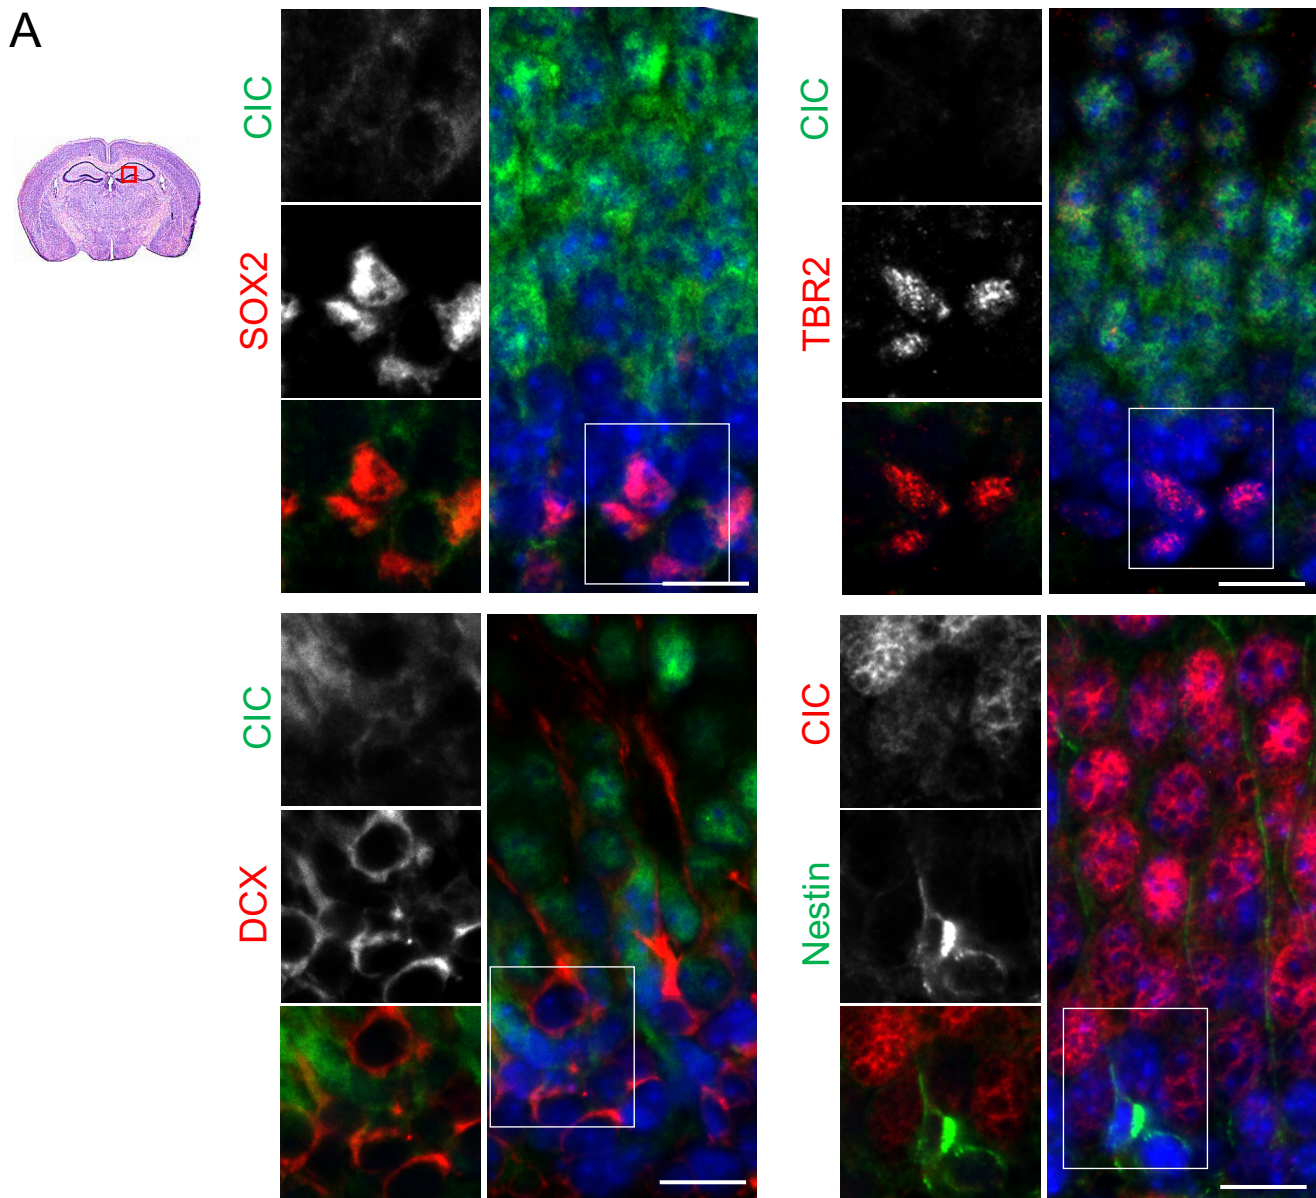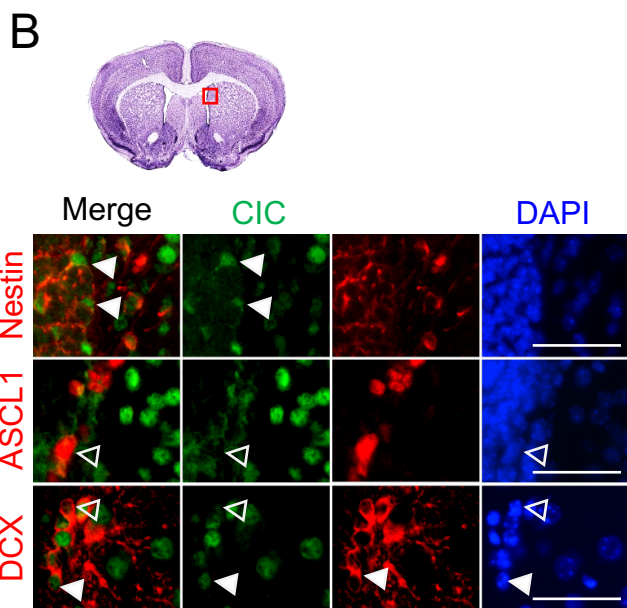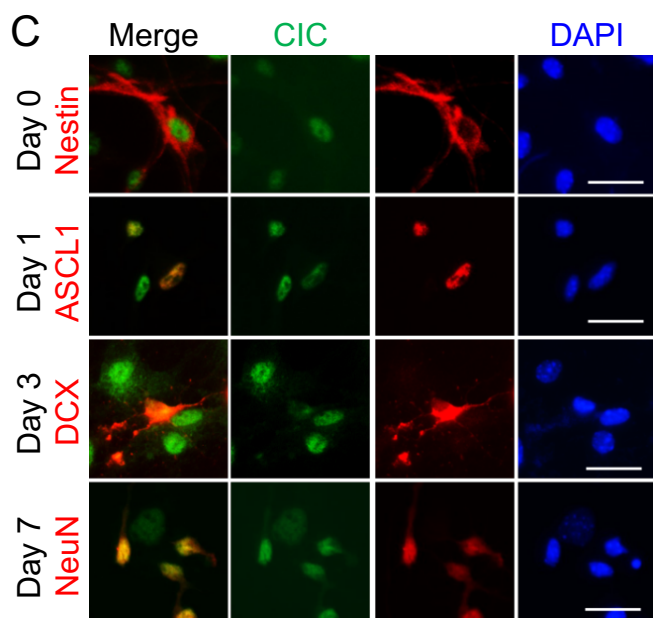

**Supplemental figure 4. The expression pattern of CIC in the brain and neural progenitor cells.** A. Co-IF for CIC with SOX2, TBR2, DCX, or Nestin in the hippocampus of P14 mouse. Scale bar=50  $\mu$ m. B. Co-IF for CIC with Nestin, ASCL1, or DCX in the SVZ of P14 mouse. Opened arrow means CIC weak cells and closed arrow means CIC high cells. Scale bar=50  $\mu$ m. C. Co-IF for CIC with Nestin, ASCL1, DCX, or NeuN in the primary NPC during differentiation. Scale bar=25  $\mu$ m. 3 experiments were conducted and the most representative experiment is shown for A-C.

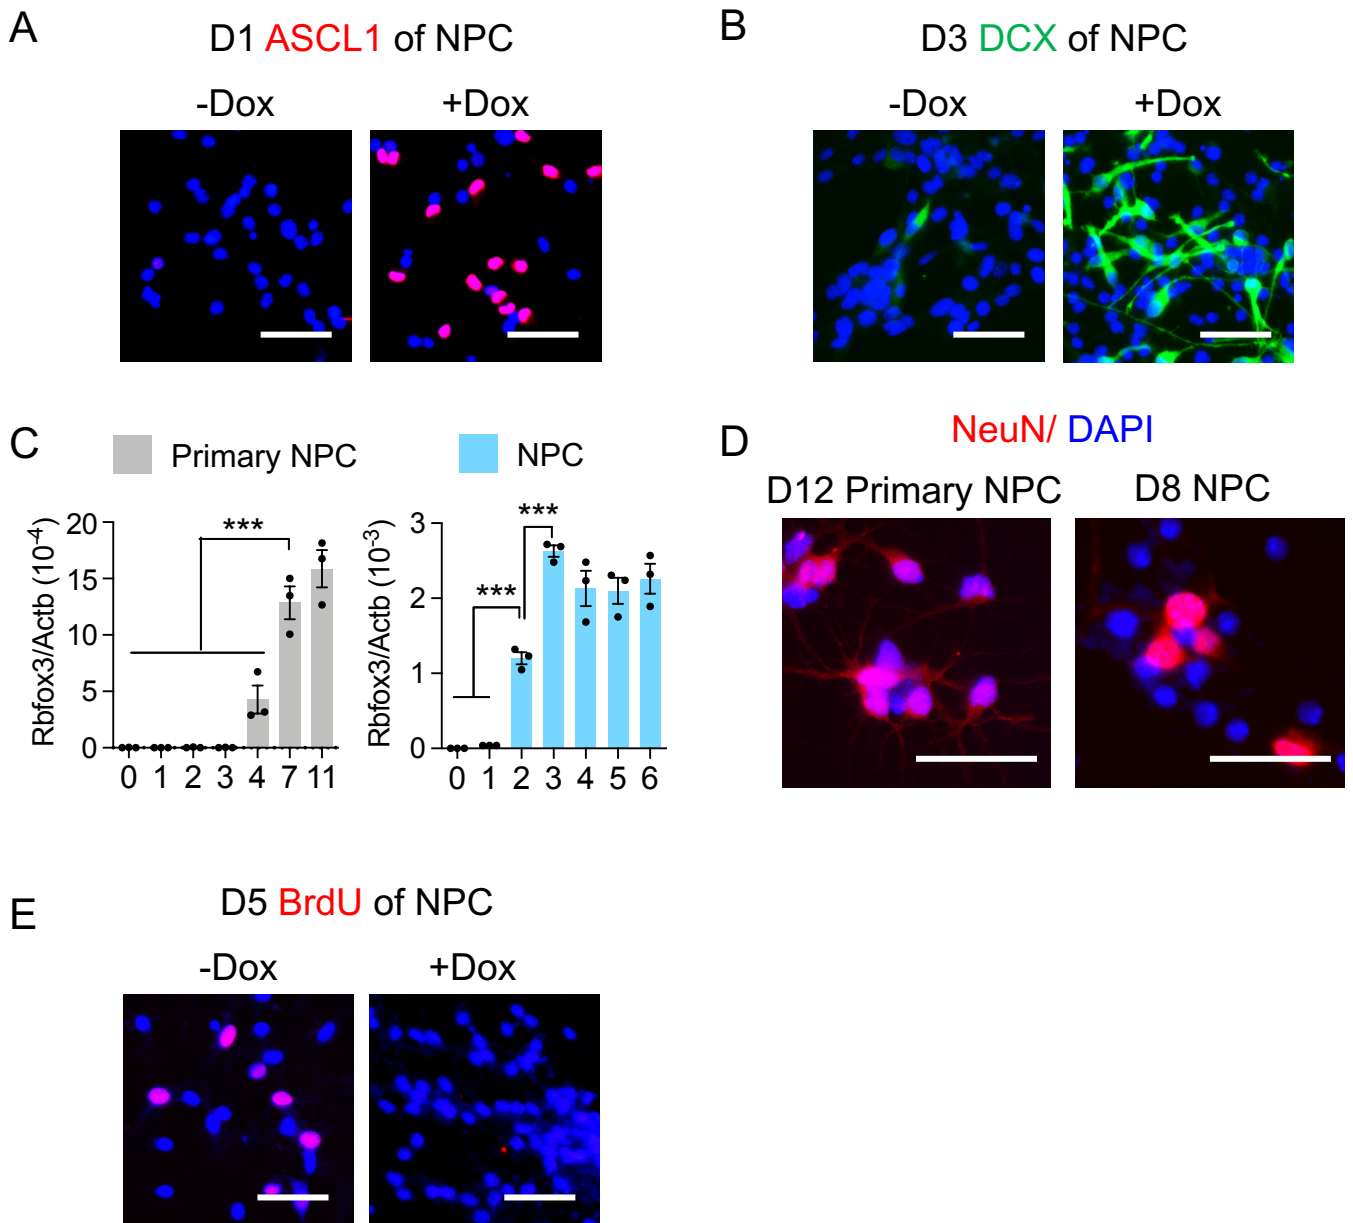

**Supplemental figure 5. Neuronal differentiation of NPC.** A. IF analysis for ASCL1 at 1 day of differentiation in NPC cultured with or without 2  $\mu\text{g/ml}$  of doxycycline (Dox). B. IF analysis for DCX at 3 day of differentiation in NPC cultured with or without 2  $\mu\text{g/ml}$  of Dox. C. qRT-PCR results of primary NPC (black bar) and NPC (blue bar) during differentiation. Mean  $\pm$  s.e.m of 3 experiments. Statistical significance was determined by one-way ANOVA. \*\*\*  $p < 0.001$ . D. IF analysis for NeuN in D12 primary NPC (left) and D8 NPC (right). E. IF analysis for BrdU incorporation at 5 day of differentiation in NPC cultured with or without 2  $\mu\text{g/mL}$  of Dox. Scale bar=50  $\mu\text{m}$ . 3 experiments were conducted and the most representative experiment is shown for A, B, D, and E.

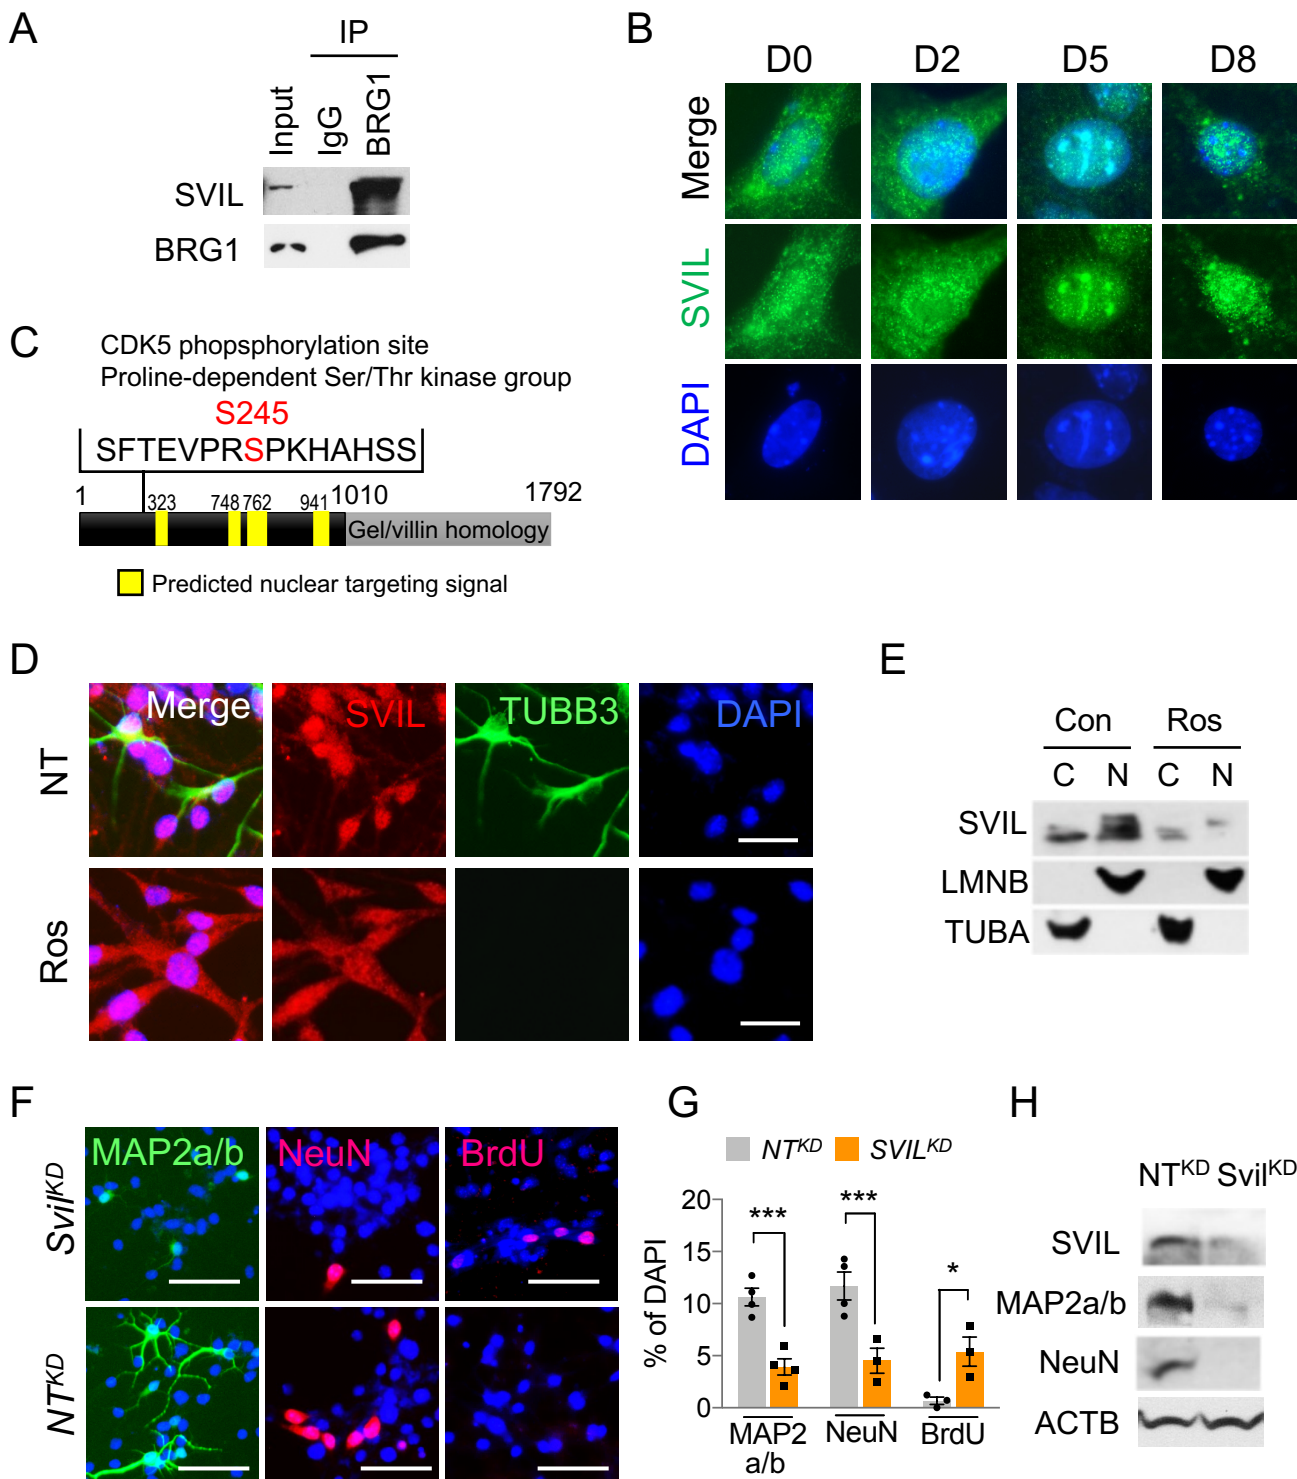



**Supplemental figure 6. Nuclear translocation of SVIL is required for neurogenesis.**

A. Co-IP analysis for endogenous proteins from P0.5 brain lysates. One experiment was conducted. B. Nuclear translocation of SVIL during differentiation. Scale bar=5  $\mu$ m. C. Schematic representation of phosphosite of SVIL by CDK5. D. IF analysis for SVIL and TUBB3 in non-treated (NT) and 20  $\mu$ M of Roscovitine treated cells (Ros) at 3 days of differentiation. Scale bar=25  $\mu$ m. E. WB analysis for nuclear fraction. Lamin B1 (LMNB) was used as a marker for nuclear fraction (N) and  $\alpha$ Tubulin (TUBA) was used as a marker for cytosolic fraction (C). F. IF analysis for MAP2a/b, NeuN, and BrdU in NT<sup>KD</sup> NPC and Svil<sup>KD</sup> NPC at 8 days of differentiation. Scale bar=50  $\mu$ m. G. Indicated proteins-positive cells of (F) images are counted. Mean  $\pm$  s.e.m of 100 DAPI positive nuclei from 3 experiments. Statistical significance was determined by unpaired t-test. \* $p$ <0.05,\*\*\* $p$ <0.001. H. WB analysis for each specific marker. 3 experiments were conducted and the most representative experiment is shown for D, E, and H.

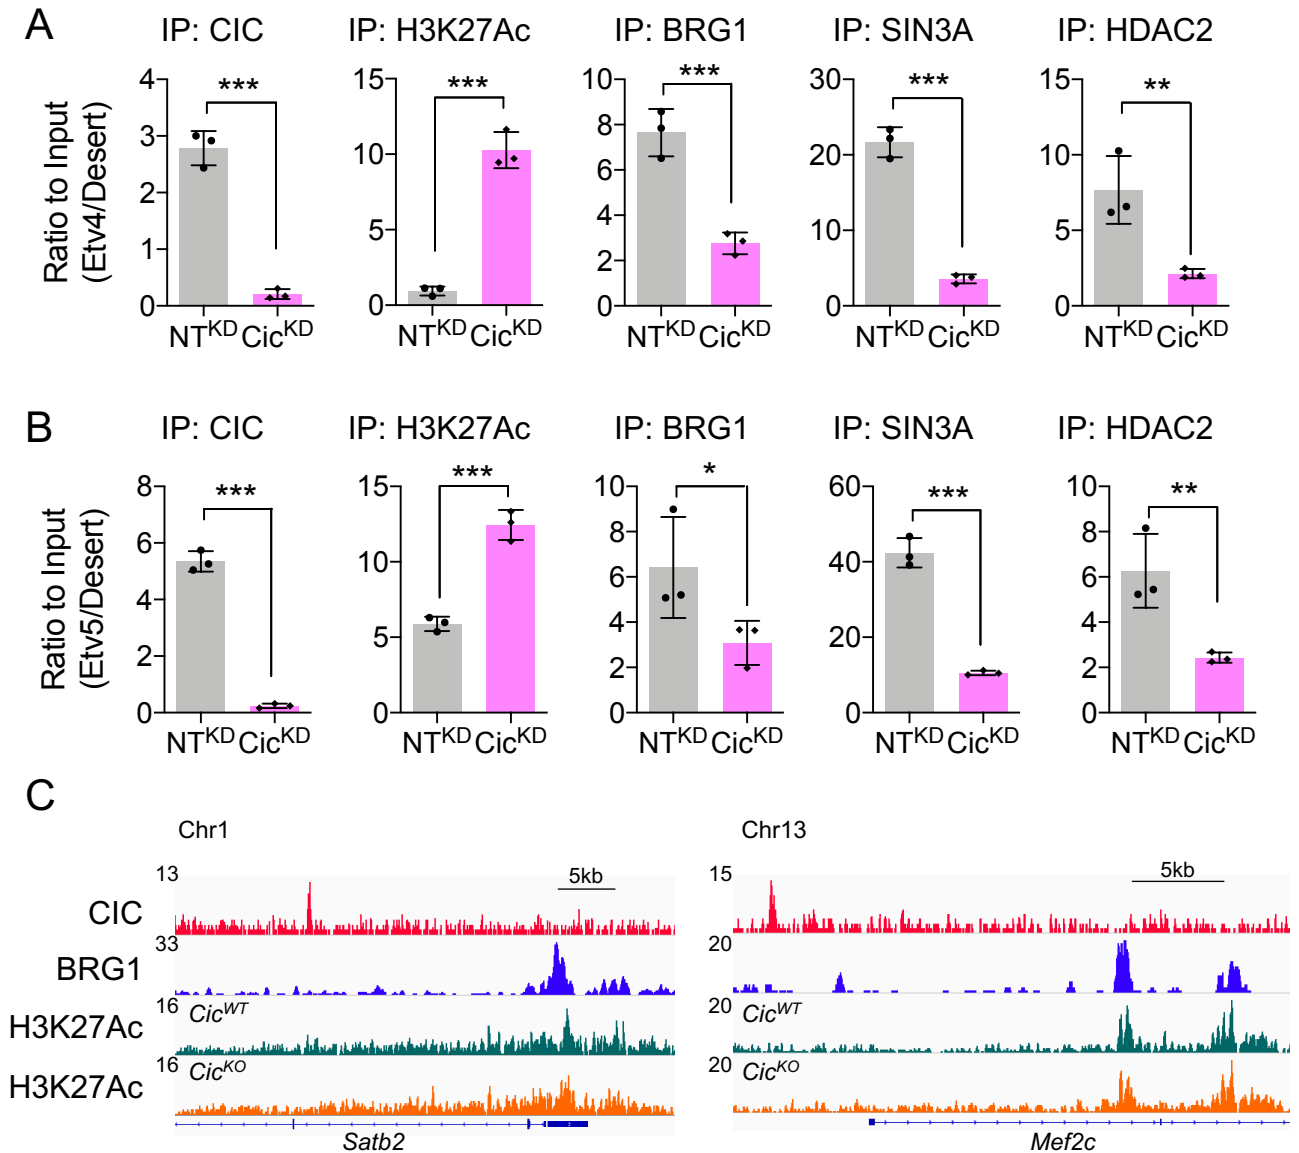

**Supplemental figure 7. mSWI/SNF-SIN3 complex is required for CIC's transcriptional regulation.** A and B. ChIP-qPCR results from NT<sup>KD</sup> NPC and Cic<sup>KD</sup> NPC at *Etv4* (A) or *Etv5* (B) promoter region. Mean  $\pm$  s.e.m. of 3 experiments. Statistical significance was determined by unpaired t-test. \* $p < 0.05$ , \*\* $p < 0.01$ , \*\*\* $p < 0.001$ . C. ChIP tracks of CIC, BRG1, and H3K27Ac in P0.5 brains of *Cic*<sup>WT</sup> and *Cic*<sup>KO</sup> mouse.

## **Supplemental Table legends**

Table S1. Integrated analysis for RNA-seq and ChIP-seq, related to Figure 3.

Table S2. The list of mass spectrometry from immunoprecipitation of CIC, related to Figure 6.

Table S3. The list of oligos, related to methods.
